# Supplementary material for: Concurrent diffusion of nicotinic acetylcholine receptors and fluorescent cholesterol disclosed by two-colour sub-millisecond MINFLUX-based single-molecule tracking
Source: Research Square preprint supplement (doi:10.21203/rs.3.rs-5619606/v1), 2025-01-24
Supplement: Supplementary file 1 [file 8965f7c0a8acb840a5491ffd.docx]

**Concurrent diffusion of nicotinic acetylcholine receptors and fluorescent cholesterol disclosed by two-colour sub-millisecond MINFLUX-based single-molecule tracking**

Francesco Reina, Lucas A. Saavedra, Christian Eggeling and Francisco J. Barrantes

**Supplementary Material**

**Detector Channel Ratio (DCR): discrimination of toxin and cholesterol probe signals**

As indicated in the main text, dissection of the trajectories of the nAChR macromolecule and the cholesterol analogue relied on the ratiometric dissection of their emission signals upon excitation with a single laser wavelength in the MINFLUX setup. DCR is calculated as I1/(I1+I2) such that I1 and I2 are the intensity obtained by both detectors used in MINFLUX to make a localization. A dye which emits only in I1 will have a DCR value of 1, and its DCR will be 0. Suppl. Figure 1 schematically depicts the DCR as the average DCR value in a single trajectory. The difference of DCR distribution between CF®680R-BTX and fPEG-Chol is apparent, justifying the use of the ratiometric approach to discriminate between the two probes in 2-colour experiments.


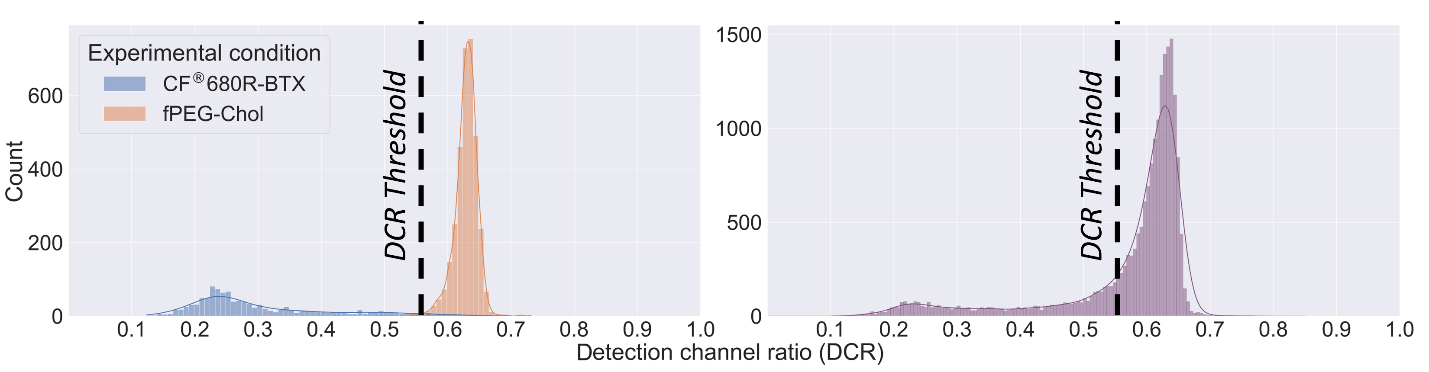


**Supplementary Figure 1. DCR analysis.** DCR histogram of experiments with CF®680R-BTX and fPEG-Chol separately (*left*) and DCR histogram of experiments with simultaneous staining with CF®680R-BTX and fPEG-Chol (*right*). A difference between the two mean distributions is observed. The vertical dashed line indicates the manually selected DCR threshold (=0.55) to isolate trajectories with fPEG-Chol and BTX680R when both experimental labelling conditions were sampled simultaneously.

**Initial characterisation of nAChR and fluorescent cholesterol trajectories**

Trajectories were first characterized in terms of extent and duration of the tracks and number of steps recorded in MINFLUX. Similar elementary parameters were quantified for the individual steps, as listed in Suppl. Table 1 below.

**Suppl. Table 1. SMT elementary parameters of nAChR and fluorescent cholesterol under different experimental conditions**

| **Parameter** | **Mean ± S.E.M** | | | |
| --- | --- | --- | --- | --- |
| **[number of steps]** | **[track duration, s]** | **[step duration, μs]** | **[displacement, nm]** |
| **CF®640R-BTX-labeled nAChR (n=3,006)*** | 1105 ± 26 | 0.948 ± 0.022 | 858.68 ± 0.61 | 15 ± 1 |
| **CF®640R-BTX-labeled nAChR + CDx (n=2,474)** | 793 ± 27 | 0.724 ± 0.019 | 914.34 ± 0.87 | 15 ± 1 |
| **Cholesterol analogue (fPEG-Chol) alone (n=1,478)** | 1012 ± 31 | 0.497 ± 0.017 | 492.18 ± 0.63 | 14 ± 1 |
| **Far-red toxin (CF®680R-BTX) alone (n=404)** | 925 ± 63 | 0.989 ± 0.063 | 1069.76 ± 2.32 | 15 ± 1 |
| **fPEG-Chol in the presence of far-red (CF®680R-BTX) toxin (n=7,057)** | 1496 ± 23 | 0.508 ± 0.008 | 340.01 ± 0.15 | 16 ± 1 |
| **Far-red toxin (CF®680R-BTX) in the presence of fPEG-Chol (n=2,219)** | 2034 ± 62 | 1.076 ± 0.030 | 529.29 ± 0.15 | 14 ± 1 |
| **CF®640R-BTX + 50 nM cholesterol (n=1,299)** | 972 ± 32 | 0.664 ± 0.022 | 684.75 ± 0.41 | 14 ± 1 |
| **CF®640R-BTX (n=734; low density) + 50nM cholesterol** | 453 ± 21 | 0.948 ± 0.022 | 689.06 ± 1.35 | 17 ± 1 |
| **fPEG-Chol in the presence of far-red toxin (CF®680R-BTX) + 50 nM cholesterol (n=1,007)** | 816 ± 34 | 0.346 ± 0.015 | 424.50 ± 0.70 | 17 ± 1 |
| **Far-red toxin (CF®680R-BTX) in the presence of fPEG-Chol + 50 nM cholesterol (n=146)** | 435 ± 54 | 0.389 ± 0.018 | 895.44 ± 5.71 | 15 ± 1 |
| **fPEG-Chol in the presence of far-red (CF®680R-BTX) + 100 nM cholesterol (n=1,119)** | 1316 ± 48 | 0.467 ± 0.018 | 355.43 ± 0.41 | 16 ± 1 |
| **Far-red toxin (CF®680R-BTX) in the presence of fPEG-Chol + 100 nM cholesterol (n=683)** | 1213 ± 55 | 0.702 ± 0.029 | 579.19 ± 1.06 | 15 ± 1 |

*n indicates the number of trajectories

**Immobile particle exclusion**

Suppl. Figure 2 shows the distribution of mobile/immobile trajectories for the different experimental conditions tested upon application of the criterion of ref. (Golan and Sherman 2017). About ~52%, ~63%, ~52%, of the trajectories from CF®640R-BTX, cholesterol-depleted (“CDx”), and CF®680R-BTX-only samples were classified as immobile, respectively. In contrast, only ~20% immobile tracks were observed for trajectories from fPEG-Chol samples either co-labelled or not with CF®680R-BTX. The number of steps of the immobile trajectories were less than 10% of those of mobile trajectories.

**
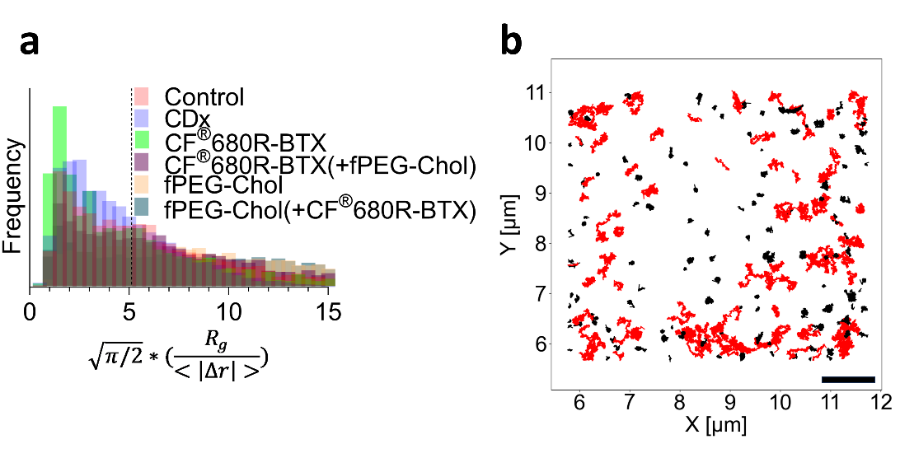
**

**Supplementary Figure 2. Classification of trajectories into mobile and immobile** (Golan and Sherman 2017). a)Distribution of the ratio of the radius of gyration and the mean step size of the recorded trajectories. Ratios between 5.121 and 5.300 (95% confidence) were obtained and a cutoff value of 5.121 was chosen (dashed vertical line). b)A region of interest (ROI) showingtrajectories from control cells labelled with CF®640R-BTX upon classification into immobile (black) and mobile (red) populations. Scale bar = 1 µm.

**Extraction of kinetic parameters from MSD curves**

As shown in Figure 1 and Table 1 in the main text, MSD analysis rendered kinetic parameters related to the diffusion regimes followed by the nAChR and the fluorescent cholesterol probe. Suppl. Table 2 summarises the anomalous diffusion coefficient corresponding to the three diffusion regimes into which trajectories were classified as in (Mosqueira et al. 2018), and Suppl. Table 3 dissects the kinetic parameters for the free-walk, non-confined portions of the trajectories and the confinement sojourns.

**Suppl. Table 2. Dissection of the anomalous exponent β and generalized diffusion coefficient Kβ of the different diffusive regimes**

| **Anomalous exponent β and generalized diffusion coefficient Kβ** | | | | | | |
| --- | --- | --- | --- | --- | --- | --- |
| **Experimental condition** | **Subdiffusive** | | **Brownian** | | **Superdiffusive** | |
| **Kβ** | **β** | **Kβ** | **β** | **Kβ** | **β** |
| **CF®640-BTX** | 0.062 ± 0.002 | 0.78 ± 0.01 | 0.149 ± 0.005 | 1.00 ± 0.01 | 0.530 ± 0.02 | 1.28 ± 0.01 |
| **CF®640-BTX upon cholesterol depletion (CDx)** | 0.051 ± 0.002 | 0.77 ± 0.01 | 0.118 ± 0.006 | 0.97 ± 0.01 | 0.379 ± 0.031 | 1.31 ± 0.01 |
| **CF®680-BTX** | 0.062 ± 0.006 | 0.80 ± 0.01 | 0.130 ± 0.010 | 1.01 ± 0.01 | 0.662± 0.074 | 1.34 ± 0.02 |
| **fPEG-Chol** | 0.124 ± 0.007 | 0.77 ± 0.01 | 0.292 ± 0.011 | 1.02 ± 0.01 | 1.689 ± 0.057 | 1.33 ± 0.01 |
| **CF®680-BTX(+fPEG-Chol)** | 0.095 ± 0.006 | 0.74 ± 0.01 | 0.345 ± 0.014 | 1.01 ± 0.01 | 1.475 ± 0.069 | 1.29 ± 0.01 |
| **fPEG-Chol(+CF®680-BTX)** | 0.353 ± 0.005 | 0.77 ± 0.01 | 0.868 ± 0.009 | 1.01 ± 0.01 | 2.482 ± 0.033 | 1.26 ± 0.01 |

**Suppl. Table 3. Generalized diffusion coefficient (Kβ) and anomalous exponent (β) within confined sojourns and non-confined states of the trajectories**

| **Experimental condition** | **Confined portions** | | **Non-confined portions** | |
| --- | --- | --- | --- | --- |
|  |  |  |  |
| **CF®640R-BTX** | 0.483 ± 0.033 | 0.99 ± 0.02 | 2.423 ± 0.254 | 1.12 ± 0.05 |
| **CF®640R-BTX upon cholesterol depletion (CDx)** | 0.321 ± 0.013 | 0.97 ± 0.02 | 1.634 ± 0.151 | 1.10 ± 0.04 |
| **CF®680R-BTX** | 0.421 ± 0.033 | 1.01 ± 0.05 | 2.229 ± 0.265 | 1.09 ± 0.05 |
| **fPEG-Chol** | 1.045 ± 0.091 | 1.10 ± 0.01 | 6.446 ± 0.238 | 1.24 ± 0.01 |
| **CF®680R-BTX(+fPEG-Chol)** | 0.940 ± 0.119 | 1.06 ± 0.01 | 6.527 ± 0.661 | 1.18 ± 0.03 |
| **fPEG-Chol(+CF®680R-BTX)** | 1.407 ± 0.049 | 0.98 ± 0.01 | 7.989 ± 0.458 | 1.15 ± 0.01 |
| ***Exogenous unlabelled cholesterol supplementation in double-labelling (toxin + fPEG-Chol) experiments*** | | | | |
| **CF®640R-BTX (+50 nM)** | 0.492 ± 0.093 | 1.04 ± 0.03 | 2.803 ± 0.436 | 1.29 ± 0.05 |
| **fPEG-Chol(+CF®680R-BTX) (+50 nM)** | 2.123 ± 0.998 | 1.12 ± 0.13 | 8.029 ± 1.667 | 1.33 ± 0.09 |
| **CF®680R-BTX(+fPEG-Chol) (+50 nM)** | 1.977 ± 0.309 | 1.09 ± 0.07 | 3.080 ± 0.727 | 1.28 ± 0.07 |
| **fPEG-Chol(+CF®680R-BTX) (+100 nM)** | 1.259 ± 0.188 | 0.96 ± 0.01 | 8.795 ± 1.197 | 1.23 ± 0.01 |
| **CF®680R-BTX(+fPEG-Chol) (+100 nM)** | 0.944 ± 0.194 | 1.07 ± 0.02 | 4.903 ± 0.868 | 1.25 ± 0.06 |

**Effects of modification of the membrane cholesterol content**

Table 1 in the main text lists the effects of cholesterol depletion of the membrane via CDx and cholesterol enrichment via exogenous cholesterol supplementation. Suppl. Figure 3 shows the effect of supplementation of the CHO-K1/A5 cells with aqueous-soluble cholesterol. Addition of exogenous cholesterol modified the time spent by BTX-labelled nAChRs and fPEG-cholesterol in their confined- and non-confined states.


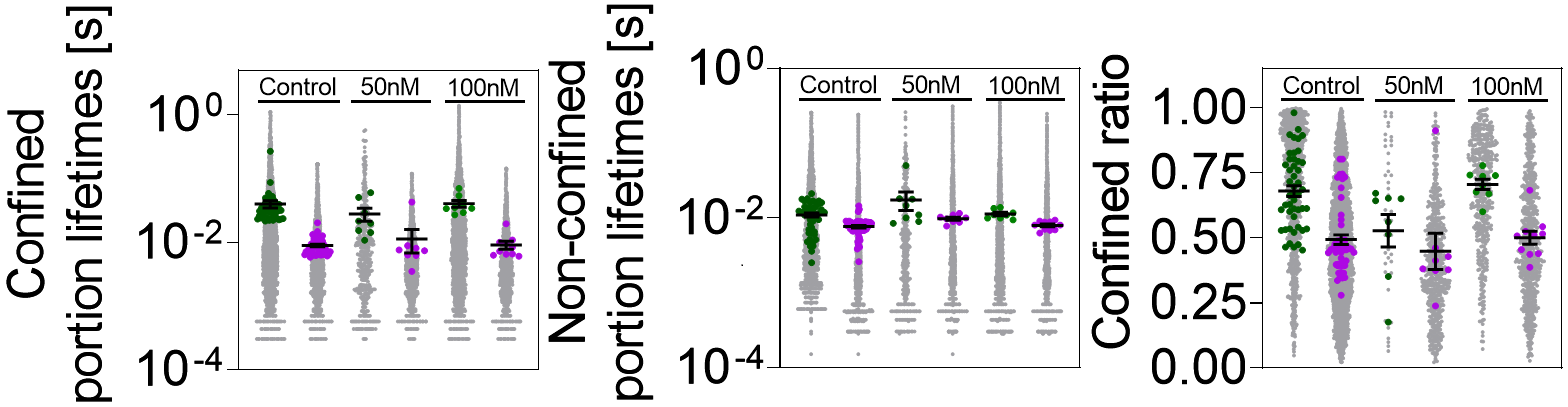


**Supplementary Figure 3. Confinement parameters of the cholesterol probe and toxin-labelled nAChR trajectories.** Total residence time in confinement (*left*) and non-confinement (*middle*) states and confinement ratio defined as the quotient between the residence time of the trajectory in the confined state and the total duration of the trajectory. (*right*) without (Control) and with addition of exogenous unlabelled cholesterol (concentration as labelled) and for: experimental conditions of CF®680R-BTX(+fPEG-Chol) (*green*) and fPEG-Chol(+CF®680R-BTX) (*violet*). Boxplots show the mean and SEM of the depicted parameters.

Additional confinement sojourn parameters were measured, as shown in Suppl. Figure 4. CF®640R-BTX and cholesterol-depleted (CDx) samples exhibited statistical differences in the number of steps within and between confinement sojourns (p<0.0001). The same was observed between fPEG-Chol alone and the cholesterol probe in the presence of BTX (fPEG-Chol(+CF®680R-BTX)) (p<0.0001). These differences suggest that modifying the cholesterol content of the membrane changes trajectory parameters of the BTX-labelled receptors, and vice versa.

The ratio between the residence time and trajectory duration, rconfined, was the same for CF®640R-BTX and CDx-treated samples (0.75 ± 0.01), i.e., 3/4 of the time these trajectories were confined. For CF®680R-BTX, rconfined was 0.62 ± 0.01. Upon supplementation of cholesterol, this ratio decreased to 0.50 ± 0.01 (p<0.0001). In the case of fPEG-Chol, we found that in the absence and presence of CF®680R-BTX the ratio was 0.66 ± 0.01 and 0.50 ± 0.01, respectively. The confinement zone spatial dimensions, in all cases, except for fPEG-Chol, the average area distended was ~5,000 nm2. In the case of fPEG-Chol, the surface was slightly smaller (~4,000 nm2). In all cases, the mean major-axis length was ~50 nm.


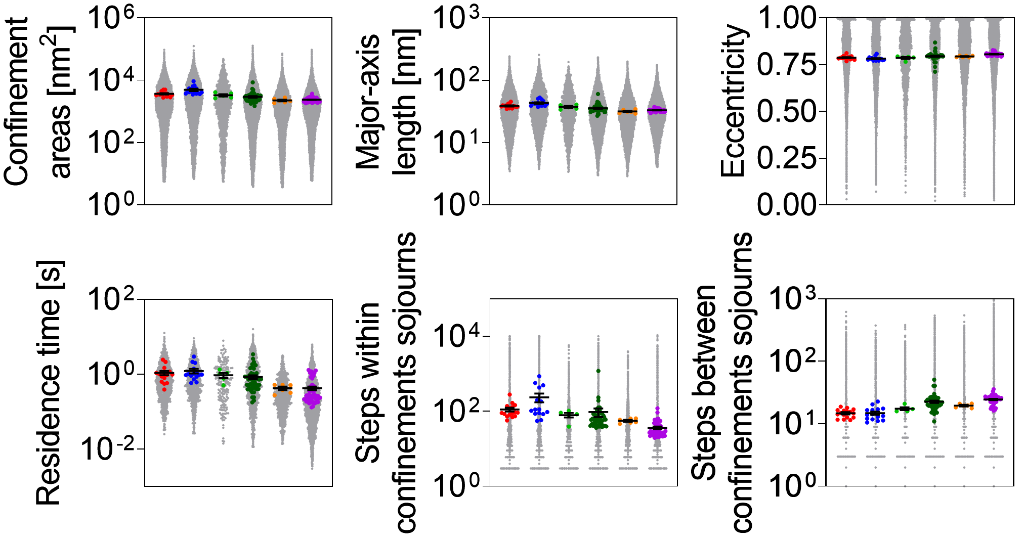


**Supplementary Figure 4.** **Confinement sojourn parameters.** Boxplots of the areas, major-axis length, eccentricities, residence times, and steps between/within confinement zones upon fitting to an ellipse. Control CF®640R-BTX (red), cholesterol-depleted samples (CDx, blue), fPEG-Chol (orange), control far-red CF®680R-BTX (green), CF®680R-BTX(+fPEG-Chol) (pink), fPEG-Chol(+CF®680R-BTX) (black).


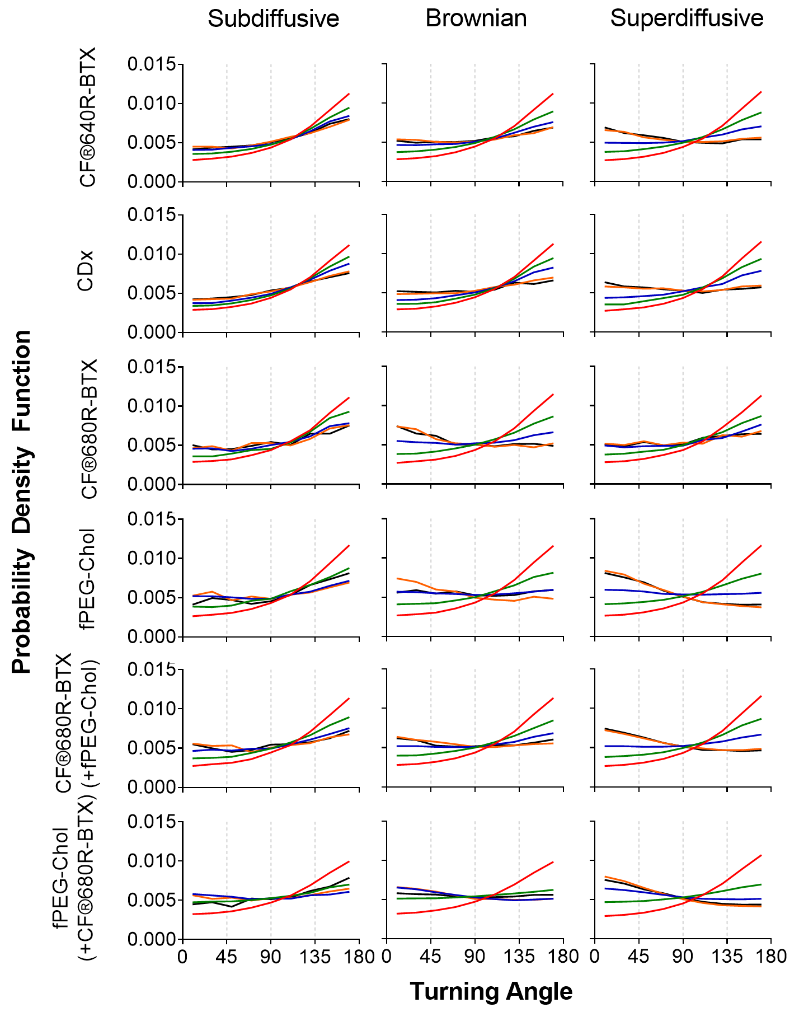


**Supplementary Figure 5**. **Probability density function of the turning angles across different anomalous diffusion behaviours on trajectory data upon application of the Golam and Sherman immobile-exclusion criterion (Golan and Sherman 2017)**. Trajectories were classified between diffusion regimes subdiffusive (β<0.9), Brownian (0.9<β≤1.1) and superdiffusive (1.1<β). CF®640R-BTX, cholesterol-depleted samples (CDx), fPEG-Chol, control CF®680R-BTX, CF®680R-BTX(+fPEG-Chol), and fPEG-Chol(+CF®680R-BTX). The probability density functions (PDF) correspond to 1 (*red*), 4 (*green*), 8 (*blue*), 25 (*orange*), 50 (*black*) step lags.

**Perturbation of the actin subcortical meshwork**

The elementary metrics of the trajectories upon treatment of the cells with CK-666 are listed in Suppl. Table 4 below. Suppl. Table 5 lists the dynamic parameters obtained by MSD fitting according to different diffusion models (as described in Material and Methods).

**Suppl. Table 4. SMT elementary parameters of nAChR and fluorescent cholesterol trajectories upon actin perturbation with CK-666**

| **Experimental condition** | **Mean ± S.E.M** | | | |
| --- | --- | --- | --- | --- |
| **[number of steps]** | **[track duration, s]** | **[step duration, μs]** | **[displacement, nm]** |
| **fPEG-Chol upon CK-666 treatment (n=1,858)** | 1418 ± 49 | 0.472 ± 0.016 | 333.47 ± 0.33 | 15 ± 1 |
| **fPEG-Chol in the presence of far-red (CF®680R-BTX) upon CK-666 treatment (n=5,927)** | 1169 ± 19 | 0.411 ± 0.007 | 351.71 ± 0.18 | 16 ± 1 |
| **Far-red toxin (CF®680R-BTX) upon CK-666 treatment (n=726)** | 473 ± 25 | 0.461 ± 0.024 | 974.88 ± 2.00 | 16 ± 1 |
| **Far-red toxin (CF®680R-BTX) in the presence of fPEG-Chol upon CK-666 treatment (n=1,261)** | 850 ± 34 | 0.623 ± 0.024 | 734.59 ± 1.08 | 15 ± 1 |

**Distinction between confinement by physical barriers and trapped states of SMT confined sojourns**

Trapping diffusion describes a particle moving with diffusion coefficient on the plane of the membrane until it is “trapped” (i.e., immobilized) and eventually untrapped (i.e., recovers mobility) with probabilities ptrap and puntrap, respectively. In contrast, hop diffusion describes motion of molecules within confinement sojourns imposed by physical compartments of characteristic size, like actin fences or “corrals” (Fujiwara et al. 2016; Fujiwara et al. 2023). Molecules transiently confined within the compartment boundaries can eventually move or “hop” into another compartment with probability phop (Fujiwara et al. 2016). The two restricted motions can be described by the algorithm of (Sikora et al. 2017), which defines confinement in terms of the repeated passage of a particle through the same coordinates.

The percentage of hop motion of toxin-tagged nAChR and fPEG-Chol analysed according to Eggeling and coworkers (Reina et al. 2022) and Hell and coworkers (Rickert et al. 2024) amounted to only 10-20%. We undertook an additional analysis of the motional behaviour of fluorescently-labelled molecules in the confined sojourns to further elucidate the nature of the confinement phenomenon. To this end we developed a machine learning procedure that builds on the feature-based neural network termed CONDOR (Gentili and Volpe 2021), with the specific task of discriminating between the two possible confinement mechanisms. The original CONDOR takes as input a feature vector including variables extracted from the trajectory. Here, we fed the feature vector of each confinement portion detected by the recurrent algorithm (Sikora et al. 2017) and classified the portions between the two confinement mechanisms. We also modified CONDOR to include as input the feature vector generated from the confined portions including the mean, median, standard deviation, skewness, kurtosis, and squared mean of the displacements. Step lag values between 1 and 9 steps were considered. The resulting input vector included 60 features, much less than the number in the original CONDOR. The rationale behind this choice is that the task to be accomplished here is much simpler than classifying trajectories into five theoretical models (Gentili and Volpe 2021).

We generated a dataset of 70,000 confined portions belonging to compartmentalized or trapped states, with μm2 s-1. Next, the dataset was randomly split into validation (14,000 portions) and training (56,000 portions) datasets. To simulate compartment-limited confinement vs. trapping, a ROI of 5 µm x 5 µm was partitioned into Voronoi regions (compartments) randomly distributed across the ROI (Rickert et al. 2024). The edges of the Voronoi regions had lengths between 10 and 250 nm. Next, a particle was placed in the middle of the ROI and moved stochastically until it hit an edge of the compartment. As phop was assigned a value equal to 0, the particle bounced (Pinkwart et al. 2019). In the case of trapping, immobile particles were simulated. A Gaussian noise of 10 nm was added to all simulated confined portions. Suppl. Figure 6a shows the temporal evolution of the validation and training error as the number of epochs increased. Suppl. Figure 6b shows the corresponding confusion matrix depicting how well the trained model classified the confined portions in the validation dataset. The loss chosen for the training was binary categorical cross entropy.


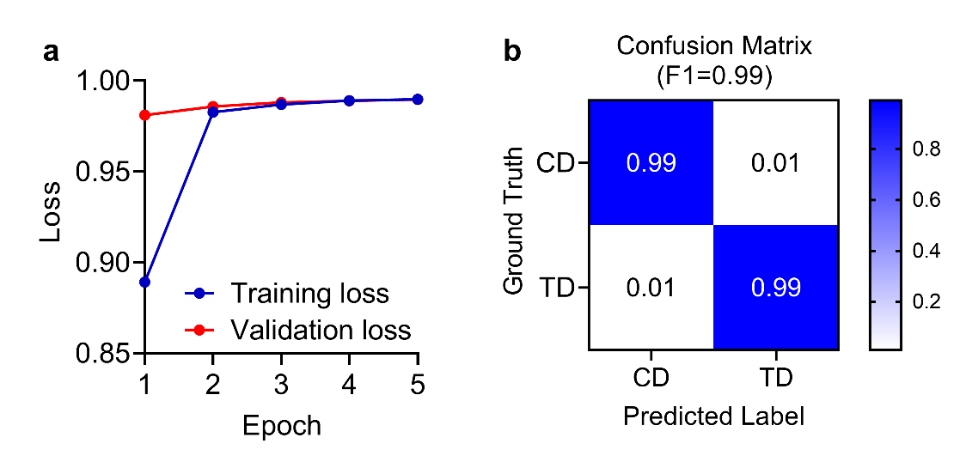


**Suppl. Figure 6. CONDOR training parameters.** a) The binary categorical cross entropy loss from the training and validation dataset vs. the number of epochs iterated during training. b) The confusion matrix depicts the classification performance of the trained model between compartment-driven (CD) and trapped-driven (TD) confinement discriminated across 14,000 simulated confined portions.

**Suppl. Table 5. Diffusional behaviour of molecules within confinement sojourns resulting from CONDOR inference machine learning analysis (Gentili and Volpe 2021)**

| **Condition** | **Compartmentalized** | | **Trapping** | |
| --- | --- | --- | --- | --- |
| **%** | **Area ()** | **%** | **Area ()** |
| **BTX640R** | 93.33% | 0.008 ± 0.001 | 6.67% | 0.007 ± 0.001 |
| **BTX680R** | 94.26% | 0.008 ± 0.001 | 5.74% | 0.004 ± 0.001 |
| **BTX680(+fPEG-Chol)** | 90.12% | 0.008 ± 0.001 | 9.88% | 0.008 ± 0.001 |
| **BTX640R upon CDx Chol depletion** | 94.22% | 0.010 ± 0.001 | 5.78% | 0.012 ± 0.001 |
| **BTX680(+fPEG-Chol) (+100 nM exogenous Chol)** | 92.94% | 0.007 ± 0.001 | 7.06% | 0.003 ± 0.001 |
| **fPEG-Chol** | 88.53% | 0.006 ± 0.001 | 11.47% | 0.002 ± 0.001 |
| **fPEG-Chol (+BTX680)** | 94.58% | 0.006 ± 0.001 | 5.42% | 0.002 ± 0.001 |
| **fPEG-Chol(+BTX680R) (50 nM exogenous Chol)** | 96.94% | 0.006 ± 0.001 | 3.06% | 0.002 ± 0.001 |
| **fPEG-Chol(+BTX680R) (+100 nM exogenous Chol)** | 96.28% | 0.006 ± 0.001 | 3.72% | 0.002 ± 0.001 |
| **fPEG-Chol upon CK-666 treatment** | 91.85% | 0.006 ± 0.001 | 8.15% | 0.002 ± 0.001 |
| **fPEG-Chol (+BTX680R) upon CK-666 treatment** | 96.02% | 0.006 ± 0.001 | 3.98% | 0.002 ± 0.001 |
| **BTX680R(+fPEG-Chol) (+ 50 nM exogenous Chol)** | 89.45% | 0.005 ± 0.001 | 10.55% | 0.003 ± 0.001 |
| **BTX680R (upon CK-666 treatment)** | 96.66% | 0.008 ± 0.001 | 3.34% | 0.005 ± 0.001 |
| **BTX680R(+fPEG-Chol) (upon CK-666 treatment)** | 93.42% | 0.007 ± 0.001 | 6.58% | 0.003 ± 0.001 |

As shown in Suppl. Table 5, the confinement sojourns of both nAChR and fPEG-Chol molecules were largely dominated by the compartment-driven mechanism over trapping under all conditions, extending over areas of ~0.008 µm2 and ~0.006 µm2, respectively. fPEG-Chol compartmentalization was lower than that of the toxin-labelled receptor and slightly increased upon CK-666 treatment, while fPEG-Chol trajectories exhibited the highest, albeit small, degree of trapping among all conditions examined. Only slight changes in this behaviour were observed upon modifying cholesterol content or disrupting the submembrane actin cytoskeleton compartments by CK-666. CONDOR indicates that particles almost never remain (transiently) immobile.

**References**

Fujiwara, T. K., K. Iwasawa, Z. Kalay, T. A. Tsunoyama, Y. Watanabe, Y. M. Umemura, H. Murakoshi, K. G. Suzuki, Y. L. Nemoto, N. Morone, and A. Kusumi. 2016. Confined diffusion of transmembrane proteins and lipids induced by the same actin meshwork lining the plasma membrane. *Mol Biol Cell* 27 (7):1101-1119.

Fujiwara, T. K., S. Takeuchi, Z. Kalay, Y. Nagai, T. A. Tsunoyama, T. Kalkbrenner, K. Iwasawa, K. P. Ritchie, K. G. N. Suzuki, and A. Kusumi. 2023. Development of ultrafast camera-based single fluorescent-molecule imaging for cell biology. *Journal of Cell Biology* 222 (8).

Gentili, A., and G. Volpe. 2021. Characterization of anomalous diffusion classical statistics powered by deep learning (CONDOR). *Journal of Physics A: Mathematical and Theoretical* 54:314003.

Golan, Y., and E. Sherman. 2017. Resolving mixed mechanisms of protein subdiffusion at the T cell plasma membrane. *Nat Commun* 8:15851.

Mosqueira, A., P. A. Camino, and F. J. Barrantes. 2018. Cholesterol modulates acetylcholine receptor diffusion by tuning confinement sojourns and nanocluster stability. *Sci Rep* 8 (1):11974.

Pinkwart, K., F. Schneider, M. Lukoseviciute, T. Sauka-Spengler, E. Lyman, C. Eggeling, and E. Sezgin. 2019. Nanoscale dynamics of cholesterol in the cell membrane. *J Biol Chem* 294 (34):12599-12609.

Reina, F., C. Eggeling, and B. C. Lagerholm. 2022. Quantification of live cell membrane compartmentalization with high-speed single lipid tracking through interferometric Scattering Microscopy. *bioRxiv*:2021.2008.2006.455401.

Rickert, J. D., M. O. Held, J. Engelhardt, and S. W. Hell. 2024. 4Pi MINFLUX arrangement maximizes spatio-temporal localization precision of fluorescence emitter. *Proceedings of the National Academy of Sciences* 121 (11):e2318870121.

Sikora, G., K. Burnecki, and A. Wylomanska. 2017. Mean-squared-displacement statistical test for fractional Brownian motion. *Phys Rev E* 95 (3-1):032110.
